# Supplementary material
Source: Springer Nature journal article supplement (https://www.springermedizin.de/resource/supplementary/13685_2014_31_MOESM20_ESM.pdf/9681246)

**Kidney MAT I-II-III**

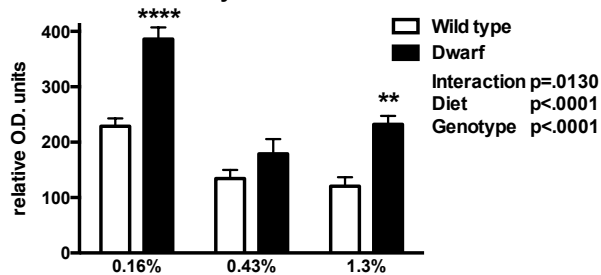

**Kidney Cbs**

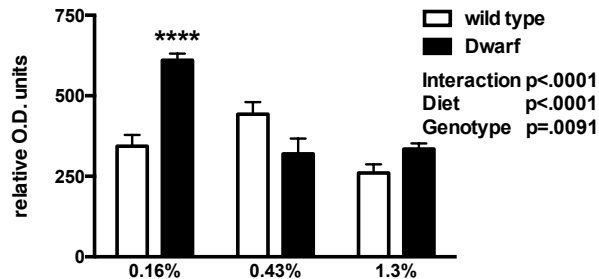

**Kidney Cth**

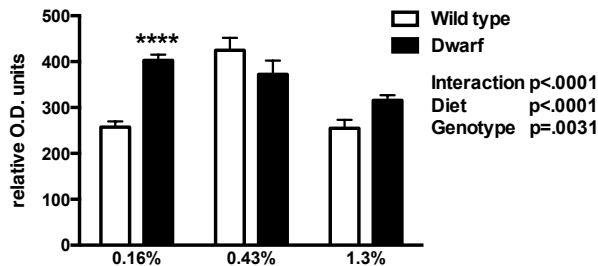

% methionine

**Kidney CDO**

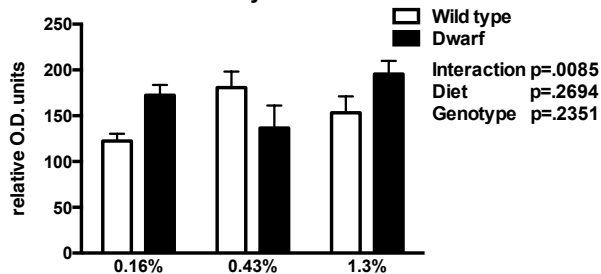

% methionine

Supplement: MOESM20 [file 9681246]
